# Supplementary material
Source: MDPI journal article supplement (https://www.mdpi.com/2073-4441/14/15/2413)
Supplement: s1 [file s1]

# Supplementary Materials

## Adsorption mechanism of high-concentration ammonium by Chinese natural zeolite with experimental optimization and theoretical computation

Pan Liu <sup>1,2</sup>, Aining Zhang <sup>1</sup>, Yongjun Liu <sup>1,\*</sup>, Zhe Liu <sup>1</sup>, Xingshe Liu <sup>1</sup>, Lu Yang <sup>1</sup>, and Zhuangzhuang Yang <sup>1</sup>

1 School of Environmental and Municipal Engineering, Xi'an University of Architecture and Technology, Xi'an, 710055, PR China

2 Xi'an Aeronautical Polytechnic Institute, Xi'an 710089, PR China

\* Correspondence: liuyongjun@xauat.edu.cn

Table S1. The representative equations of the studied kinetic and isotherm model and their parameters

| Kinetic models      |                                                       |                                                                                                                                                                |
|---------------------|-------------------------------------------------------|----------------------------------------------------------------------------------------------------------------------------------------------------------------|
| Model               | Equation                                              | Parameters                                                                                                                                                     |
| Pseudo-first-order  | $q_t = q_e(1 - e^{-k_1 t})$                           | $q_t$ (mg/g) is the adsorption capacities at time $t$ (min), and $k_1$ ( $\text{min}^{-1}$ ) is the rate constant of the kinetic model.                        |
| Pseudo-second-order | $\frac{t}{q_t} = \frac{1}{k_2 q_e^2} + \frac{t}{q_e}$ | $q_e$ (mg/g) is the sorption capacity at equilibrium, and $k_2$ is the rate constant ( $\text{g/mg} \cdot \text{min}$ ).                                       |
| Isotherm models     |                                                       |                                                                                                                                                                |
| Model               | Equation                                              | Parameters                                                                                                                                                     |
| Langmuir            | $q_e = \frac{q_m K_L C_e}{1 + K_L C_e}$               | $C_e$ is the aqueous-phase adsorbate equilibrium concentration (mg/L), $K_L$ (L/mg) is Langmuir isotherm constant, and $q_m$ (mg/g) is the monolayer capacity. |
|                     | $R_L = \frac{1}{1 + K_L C_i}$                         | $K_L$ = Langmuir isotherm constant (L/mg), $C_i$ = Initial adsorbate concentration (mg/L)                                                                      |
| Freundlich          | $q_e = K_F C_e^{\frac{1}{n}}$                         | $K_F$ is the Freundlich constant and $1/n$ is the heterogeneity factor. $K_F$ and $n$ are generally temperature dependent.                                     |

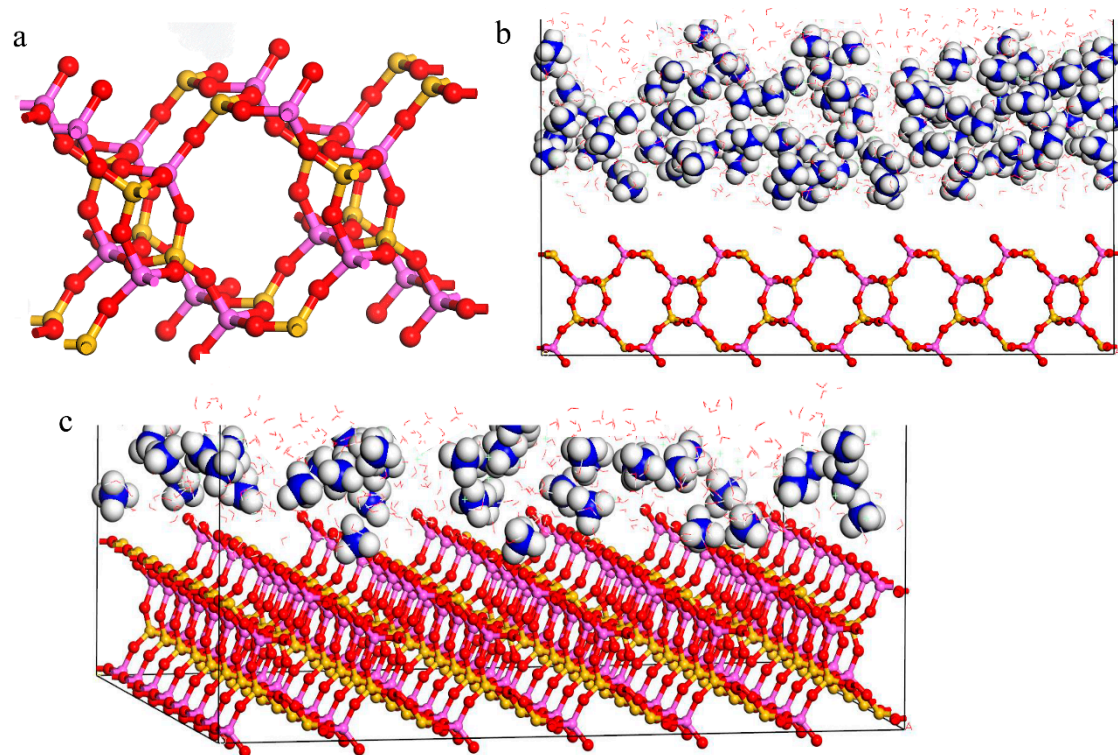

**Figure S1.** The optimized structures of high-ammonium adsorption onto the natural zeolite. (a) structure of the Chinese natural zeolite; (b) the initial model with 2-nm-high vacuum layer in the upper periodic lattice; (c) the distribution of the random positions of ammonium on the pore surface. Yellow represents Si atoms, pink = Al, red = O, white= H, blue= N.

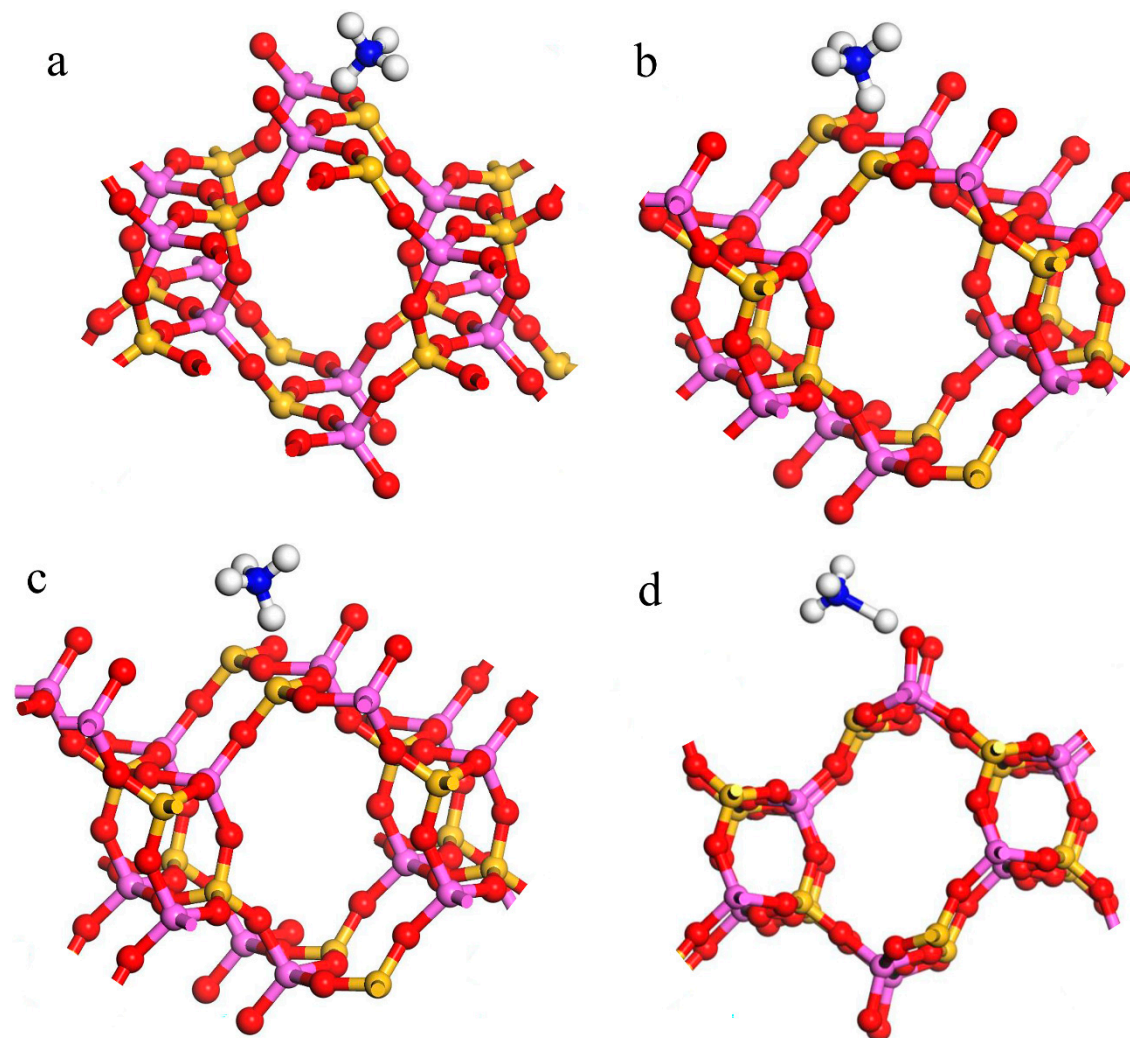

**Figure S2.** Visualization of ammonium ions adsorbed on different sites of the zeolite framework. (a) and (b) on Al and Si atoms, respectively, (c) and (d) on bridged and unbonded O atom.
